# Supplementary material for: Development and validation of an analytical method for detection and quantification of benzophenone, bisphenol A, diethyl phthalate and 4-nonylphenol by UPLC-MS/MS in surface water
Source: PeerJ journal article supplement (doi:10.7717/peerj-achem.7), 2020-07-06
Supplement: supplemental_material_1.xlsx [file supplemental_material_1.xlsx]

## Sheet: Adsorved Load 
		Eluted mass =					6.25 µg
		Analyte	Initial time				Finish time				% Adsorved Load
			Peak Area
			Test 1	Test 2	Test 3	medium	Test 1	Test 2	Test 3	medium
		4NP	1215.47	1252.35	1310.79	1259.54	16.7	18.48	17.52	17.5667	98.6053
		BP	33571.7	34569.4	37762.1	35301.1	317.38	227.52	233.89	259.597	99.2646
		BPA	1085.17	1276.78	1051.68	1137.88	17.39	24.21	22.89	21.4967	98.1108
		DEP	59864.9	59889.8	61676.9	60477.2	5597.15	5377.37	5566.18	5513.57	90.8832
		Eluted mass =					12.5 µg
		Analyte	Initial time				Finish time				% Adsorved Load
			Peak Area
			Test 1	Test 2	Test 3	medium	Test 1	Test 2	Test 3	medium
		4NP	1104.58	1098.47	1111.02	1104.69	14.24	11.04	12.69	12.6567	98.8543
		BP	3041.57	2989.57	3057.89	3029.68	424.78	442.36	435.74	434.293	85.6654
		BPA	1124.25	1099.04	1107.54	1110.28	23.54	30.47	28.41	27.58	97.5159
		DEP	57846	58555.5	59047.2	58482.9	10596.5	12347.3	11025.4	11323	80.6387
		Eluted mass =					25.0 µg
		Analyte	Initial time				Finish time				% Adsorved Load
			Peak Area
			Test 1	Test 2	Test 3	medium	Test 1	Test 2	Test 3	medium
		4NP	934.979	963.351	1008.3	968.878	593.439	581.362	591.297	588.7	39.2391
		BP	25824.4	26591.8	29047.8	27154.7	15146.4	16125.9	17679.3	16317.2	39.9101
		BPA	834.751	982.141	808.992	875.294	521.191	517.091	514.222	517.501	40.8769
		DEP	46050	46069.1	47443.8	46521	27870.7	27257.3	28694	27940.6	39.9397

## Sheet: Recovery
	eluition volume =					1 x 4 mL
	Analyte	Concentration final		25 µg L-1		Analytical Curve parameters		Conc (ng L-1)	% Recovery
		Peak Area
		Test 1	Test 2	Test 3	medium	slope	intercept
	4NP	734.12	746.87	727.55	736.18	65.93	13.55	10.9606	43.8423
	BP	9681.68	9788.36	9862.11	9777.38	788.25	1219.25	10.8571	43.4285
	BPA	245.17	248.78	242.68	245.543	33.11	-90.19	10.1399	40.5598
	DEP	35605.2	34819.7	36858.7	35761.2	2201.35	9873.7	11.7598	47.0393
	eluition volume =					2 x 2 mL
	Analyte	Concentration initial		25 µg L-1		Analytical Curve parameters		Conc (ng L-1)	% Recovery
		Peak Area
		Test 1	Test 2	Test 3	medium	slope	intercept
	4NP	914.52	904.58	908.66	909.253	65.93	13.55	13.5857	54.3427
	BP	11547.9	12041.5	12775	12121.5	788.25	1219.25	13.8309	55.3236
	BPA	317.45	316.55	311.41	315.137	33.11	-90.19	12.2418	48.9673
	DEP	41846	42555.5	41047.2	41816.2	2201.35	9873.7	14.5104	58.0417
	eluition volume =					1 x 5 mL
	Analyte	Concentration initial		25 µg L-1		Analytical Curve parameters		Conc (ng L-1)	% Recovery
		Peak Area
		Test 1	Test 2	Test 3	medium	slope	intercept
	4NP	1341.24	1350.47	1298.04	1329.92	65.93	13.55	19.9661	79.8645
	BP	15125.5	15004.7	15098.6	15076.3	788.25	1219.25	17.5795	70.3179
	BPA	547.88	551.58	554.1	551.187	33.11	-90.19	19.3711	77.4843
	DEP	51849.9	52469.1	54443.8	52921	2201.35	9873.7	19.5549	78.2197
	eluition volume =					2 x 2.5 mL
	Analyte	Concentration initial		25 µg L-1		Analytical Curve parameters		Conc (ng L-1)	% Recovery
		Peak Area
		Test 1	Test 2	Test 3	medium	slope	intercept
	4NP	1501.55	1578.54	1544.25	1541.45	65.93	13.55	23.1745	92.6981
	BP	19545.6	19996.5	20846	20129.3	788.25	1219.25	23.99	95.9599
	BPA	654.12	653.24	650.47	652.61	33.11	-90.19	22.4343	89.7372
	DEP	61849.9	60469.1	59443.8	60587.6	2201.35	9873.7	23.0376	92.1506
