# Supplementary material for: Development and validation of an analytical method for detection and quantification of benzophenone, bisphenol A, diethyl phthalate and 4-nonylphenol by UPLC-MS/MS in surface water
Source: PeerJ journal article supplement (doi:10.7717/peerj-achem.7), 2020-07-06
Supplement: supplemental_material_2.xlsx [file supplemental_material_2.xlsx]

## Sheet: Accur Precision Intra day 1
	Intra day 1
	Analyte	Concentration initial		50 ng L-1				Concentration final				5 µg L-1
		Peak Area						Analytical Curve parameters		Conc (ng L-1)	Conc medium (ng L-1)	% Accuracy	% Precision
		Test 1	Test 2	Test 3	Test 4	Test 5	medium	slope	intercept
	4NP	315.25	318.63	318.41	322.25	320.96	319.1	65.93	13.55	4.63446	4.64362	92.8724	0.889463
		314.96	322.32	316.58	320.85	322.14	319.37			4.63856
		321.52	319.08	319.05	318.36	325.2	320.642			4.65785
	BP	5042.7	5370.27	4756.51	4510.83	4840.2	4904.1	788.25	1219.25	4.67472	4.67104	93.4208	4.74218
		5239.8	4905.7	5010.83	4728.62	4897.2	4956.43			4.74111
		4775.22	5173.17	4858.87	4785.62	4622.42	4843.06			4.59728
	BPA	78.14	75.41	74.9757	71.2703	74.4973	74.8586	33.11	-90.19	4.98486	4.98554	99.7109	3.55389
		79.05	76.36	73.2486	70.9568	73.2514	74.5734			4.97624
		79.65	75.98	75.2324	72.2297	72.9676	75.2119			4.99553
	DEP	21300.5	23059.8	22451.7	20839.8	19936.2	21517.6	2201.35	9873.7	5.28942	5.36838	107.368	4.93361
		21257	22017	21745.2	20610.3	21710.2	21467.9			5.26688
		23112.3	21310.6	23494.4	22352.8	20173.1	22088.6			5.54883
	Intra day 1
	Analyte	Concentration initial		250 ng L-1				Concentration final			25 µg L-1
		Peak Area						Analytical Curve parameters		Conc (ng L-1)	Conc medium (ng L-1)	% Accuracy	% Precision
		Test 1	Test 2	Test 3	Test 4	Test 5	medium	slope	intercept
	4NP	1541.25	1531.25	1604.08	1635.28	1525.92	1567.56	65.93	13.55	23.5705	23.923	95.6918	2.08201
		1625.14	1615.14	1595.31	1606.49	1609.81	1610.38			24.2201
		1596.35	1586.35	1610.75	1597.72	1581.02	1594.44			23.9783
	BP	22148.7	23085	21439	19985.6	23547.1	22041.1	788.25	1219.25	26.4153	26.6555	106.622	5.94239
		24578.2	22006.2	22241.2	22475.1	21023.2	22464.8			26.9528
		20478.2	22324.2	22049	24587.2	21489.3	22185.6			26.5986
	BPA	614.25	614.3	604.96	584.56	600.03	603.62	33.11	-90.19	20.9547	21.0363	84.1451	3.96778
		628.14	598.74	602.14	597.21	597.11	604.668			20.9863
		601.28	682.34	597.25	591.25	581.25	610.674			21.1677
	DEP	54978.8	57408.7	59765.7	58522	58852.5	57905.5	2201.35	9873.7	21.8193	21.2998	85.1993	4.6599
		54336.7	53842.3	59887.8	57412.3	59630.1	57021.9			21.4178
		54186.8	53750	60048.3	52479	56330	55358.8			20.6624
	Intra day 1
	Analyte	Concentration initial		500 ng L-1				Concentration final			50 µg L-1
		Peak Area						Analytical Curve parameters		Conc (ng L-1)	Conc medium (ng L-1)	% Accuracy	% Precision
		Test 1	Test 2	Test 3	Test 4	Test 5	medium	slope	intercept
	4NP	2956.57	2803	2630.96	2985.09	2635.06	2802.14	65.93	13.55	42.2962	41.2486	82.4973	4.62211
		2745.96	2693.58	2572	2774.48	2778.21	2712.85			40.9418
		2636.54	2836.73	2563.59	2665.06	2719.25	2684.23			40.5079
	BP	32785.4	36320.6	37320.2	37685.4	33150.7	35452.4	788.25	1219.25	43.4294	43.8549	87.7097	3.87147
		36589.7	36205.9	35590.1	35955.4	36954.9	36259.2			44.4528
		34859.6	36859.1	35475.4	35840.6	35224.9	35651.9			43.6824
	BPA	1258.47	1286.99	1201.14	1225.36	1423.58	1279.11	33.11	-90.19	41.356	41.9653	83.9306	6.70226
		1302.36	1330.88	1491.41	1325.63	1263.52	1342.76			43.2785
		1355.23	1383.75	1245.36	1205.67	1189.87	1275.98			41.2614
	DEP	121363	117786	119510	116691	114245	117919	2201.35	9873.7	49.0814	49.0299	98.0599	1.37861
		118414	117668	117421	119145	118779	118285			49.2478
		116325	118443	117302	117056	116937	117213			48.7605

## Sheet: Accur Precision Intra day 2
	Intra day 2
	Analyte	Concentration initial		50 ng L-1				Concentration final				5 µg L-1
		Peak Area						Analytical Curve parameters		Conc (ng L-1)	Conc medium (ng L-1)	% Accuracy	% Precision
		Test 1	Test 2	Test 3	Test 4	Test 5	medium	slope	intercept
	4NP	323.076	321.298	311.476	324.308	321.298	320.291	65.93	13.55	4.65253	4.64197	92.8394	1.46018
		321.009	323.387	309.969	320.788	318.776	318.786			4.62969
		320.41	324.307	313.075	317.125	323.625	319.709			4.64369
	BP	5617.52	5607.9	5788.03	5869.41	5753.93	5727.36	788.25	1219.25	5.71913	5.76101	115.22	1.8519
		5640.79	5731.17	5811.31	5892.69	5777.21	5770.63			5.77403
		5593.28	5783.66	5763.79	5945.17	5829.69	5783.12			5.78988
	BPA	68.3024	70.0322	66.5662	69.3388	70.0392	68.8558	33.11	-90.19	4.80356	4.82592	96.5184	2.16099
		69.7616	71.5283	67.9882	70.8201	71.5355	70.3268			4.84798
		69.0469	70.7955	67.2917	70.0946	70.8026	69.6062			4.82622
	DEP	21015.8	21166.3	21316.9	20836.2	19975.7	20862.2	2201.35	9873.7	4.9917	4.70074	94.0149	3.43001
		20406.7	20557.3	20707.9	19768.3	19163.4	20120.7			4.65487
		19310.9	19461.5	19612.1	20009.5	20016.9	19682.2			4.45566
	Intra day 2
	Analyte	Concentration initial		250 ng L-1				Concentration final			25 µg L-1
		Peak Area						Analytical Curve parameters		Conc (ng L-1)	Conc medium (ng L-1)	% Accuracy	% Precision
		Test 1	Test 2	Test 3	Test 4	Test 5	medium	slope	intercept
	4NP	1425.63	1252.41	1492.59	1282.04	1346.31	1359.8	65.93	13.55	20.4193	20.763	83.052	5.55314
		1325.41	1296.54	1378.75	1326.17	1495	1364.37			20.4888
		1409.63	1445.23	1405.08	1474.86	1381.16	1423.19			21.3809
	BP	18710.2	18382.6	18979.3	17756.7	23547.1	17718.9	788.25	1219.25	20.932	20.873	83.4921	11.0166
		16911.2	18073.3	17732.1	19704.5	21023.2	19662.6			23.3978
		18766.2	20055.8	16774.2	16417.5	21489.3	15635.8			18.2893
	BPA	625.36	623.05	625.14	621.25	641.25	627.21	33.11	-90.19	21.6672	21.6533	86.6133	1.6362
		641.52	617.63	638.64	608.47	624.53	626.158			21.6354
		623.47	638.63	617.54	637.25	617.54	626.886			21.6574
	DEP	59636.6	60214.5	61232.2	60418.6	59536.5	58852.5	2201.35	9873.7	22.2494	21.9852	87.9409	2.31719
		60232.2	57454.8	60414.2	58254.7	57404.2	59630.1			22.6027
		58569.9	56474.6	58656.3	59023.5	58161.7	56330			21.1036
	Intra day 2
	Analyte	Concentration initial		500 ng L-1				Concentration final			50 µg L-1
		Peak Area						Analytical Curve parameters		Conc (ng L-1)	Conc medium (ng L-1)	% Accuracy	% Precision
		Test 1	Test 2	Test 3	Test 4	Test 5	medium	slope	intercept
	4NP	3478.65	3109.02	3544.9	3161.68	3361.39	3331.13	65.93	13.55	50.3197	49.3954	98.7907	4.92277
		3014.25	3419.91	3080.5	3093.02	3308.93	3183.32			48.0779
		3325.14	3367.45	3391.39	3156.28	3240.27	3296.11			49.7885
	BP	36414.2	35857.9	31801.8	33622.1	35300.9	34599.4	788.25	1219.25	42.3471	41.9474	83.8948	4.10594
		34370.2	33813.8	34735.4	33632.8	33256.9	33961.8			41.5383
		36779.4	32358.2	34746.1	34307	33267.6	34291.7			41.9567
	BPA	1254.87	1214.58	1325.14	1147.58	1277.79	1243.99	33.11	-90.19	40.2954	40.5076	81.0152	5.00406
		1195.33	1296.54	1285.41	1236.54	1366.14	1275.99			41.2619
		1219.33	1157.25	1251.36	1325.14	1212.25	1233.07			39.9654
	DEP	110478	118215	111000	115914	109113	112944	2201.35	9873.7	46.8214	46.9948	93.9896	2.72598
		112365	113525	117091	111225	111590	113159			46.9192
		118457	109823	112124	116280	112686	113874			47.2438

## Sheet: Accur Precision Inter day
	Inter day
	Analyte	Concentration initial		50 ng L-1				Concentration final				5 µg L-1
		Peak Area						Analytical Curve parameters		Conc (ng L-1)	Conc medium (ng L-1)	% Accuracy	% Precision
		Test 1	Test 2	Test 3	Test 4	Test 5	medium	slope	intercept
	4NP	323.076	321.298	311.476	324.308	321.298	320.291	65.93	13.55	4.65253	4.6428	92.8559	1.46018
		321.009	323.387	309.969	320.788	318.776	318.786			4.62969
		320.41	324.307	313.075	317.125	323.625	319.709			4.64369
		315.25	318.63	318.41	322.25	320.96	319.1			4.63446
		314.96	322.32	316.58	320.85	322.14	319.37			4.63856
		321.52	319.08	319.05	318.36	325.2	320.642			4.65785
	BP	5617.52	5607.9	5788.03	5869.41	5753.93	5727.36	788.25	1219.25	5.71913	5.21603	104.321	1.8519
		5640.79	5731.17	5811.31	5892.69	5777.21	5770.63			5.77403
		5593.28	5783.66	5763.79	5945.17	5829.69	5783.12			5.78988
		5042.7	5370.27	4756.51	4510.83	4840.2	4904.1			4.67472
		5239.8	4905.7	5010.83	4728.62	4897.2	4956.43			4.74111
		4775.22	5173.17	4858.87	4785.62	4622.42	4843.06			4.59728
	BPA	68.3024	70.0322	66.5662	69.3388	70.0392	68.8558	33.11	-90.19	4.80356	4.90573	98.1146	2.16099
		69.7616	71.5283	67.9882	70.8201	71.5355	70.3268			4.84798
		69.0469	70.7955	67.2917	70.0946	70.8026	69.6062			4.82622
		78.14	75.41	74.9757	71.2703	74.4973	74.8586			4.98486
		79.05	76.36	73.2486	70.9568	73.2514	74.5734			4.97624
		79.65	75.98	75.2324	72.2297	72.9676	75.2119			4.99553
	DEP	21300.5	23059.8	22451.7	20839.8	19936.2	21517.6	2201.35	9873.7	5.28942	5.03456	100.691	3.43001
		21257	22017	21745.2	20610.3	21710.2	21467.9			5.26688
		23112.3	21310.6	23494.4	22352.8	20173.1	22088.6			5.54883
		21015.8	21166.3	21316.9	20836.2	19975.7	20862.2			4.9917
		20406.7	20557.3	20707.9	19768.3	19163.4	20120.7			4.65487
		19310.9	19461.5	19612.1	20009.5	20016.9	19682.2			4.45566
	Inter day
	Analyte	Concentration initial		250 ng L-1				Concentration final			25 µg L-1
		Peak Area						Analytical Curve parameters		Conc (ng L-1)	Conc medium (ng L-1)	% Accuracy	% Precision
		Test 1	Test 2	Test 3	Test 4	Test 5	medium	slope	intercept
	4NP	1425.63	1252.41	1492.59	1282.04	1346.31	1359.8	65.93	13.55	20.4193	22.343	89.3719	5.55314
		1325.41	1296.54	1378.75	1326.17	1495	1364.37			20.4888
		1409.63	1445.23	1405.08	1474.86	1381.16	1423.19			21.3809
		1541.25	1531.25	1604.08	1635.28	1525.92	1567.56			23.5705
		1625.14	1615.14	1595.31	1606.49	1609.81	1610.38			24.2201
		1596.35	1586.35	1610.75	1597.72	1581.02	1594.44			23.9783
	BP	18710.2	18382.6	18979.3	17756.7	23547.1	19475.2	788.25	1219.25	23.1601	24.5778	98.3111	10.2712
		16911.2	18073.3	17732.1	19704.5	21023.2	18688.9			22.1625
		18766.2	20055.8	16774.2	16417.5	21489.3	18700.6			22.1774
		22148.7	23085	21439	19985.6	23547.1	22041.1			26.4153
		24578.2	22006.2	22241.2	22475.1	21023.2	22464.8			26.9528
		20478.2	22324.2	22049	24587.2	21489.3	22185.6			26.5986
	BPA	614.25	614.3	604.96	584.56	600.03	603.62	33.11	-90.19	20.9547	21.3448	85.3792	1.6362
		628.14	598.74	602.14	597.21	597.11	604.668			20.9863
		601.28	682.34	597.25	591.25	581.25	610.674			21.1677
		625.36	623.05	625.14	621.25	641.25	627.21			21.6672
		641.52	617.63	638.64	608.47	624.53	626.158			21.6354
		623.47	638.63	617.54	637.25	617.54	626.886			21.6574
	DEP	54978.8	57408.7	59765.7	58522	19936.2	50122.3	2201.35	9873.7	18.2836	20.1075	80.4301	2.28678
		54336.7	53842.3	59887.8	57412.3	21710.2	49437.9			17.9727
		54186.8	53750	60048.3	52479	20173.1	48127.4			17.3774
		59636.6	60214.5	61232.2	60418.6	59536.5	60207.7			22.8651
		60232.2	57454.8	60414.2	58254.7	57404.2	58752.1			22.2038
		58569.9	56474.6	58656.3	59023.5	58161.7	58177.2			21.9427
	Inter day
	Analyte	Concentration initial		500 ng L-1				Concentration final			50 µg L-1
		Peak Area						Analytical Curve parameters		Conc (ng L-1)	Conc medium (ng L-1)	% Accuracy	% Precision
		Test 1	Test 2	Test 3	Test 4	Test 5	medium	slope	intercept
	4NP	3478.65	3109.02	3544.9	3161.68	3361.39	3331.13	65.93	13.55	50.3197	45.322	90.644	4.92277
		3014.25	3419.91	3080.5	3093.02	3308.93	3183.32			48.0779
		3325.14	3367.45	3391.39	3156.28	3240.27	3296.11			49.7885
		2956.57	2803	2630.96	2985.09	2635.06	2802.14			42.2962
		2745.96	2693.58	2572	2774.48	2778.21	2712.85			40.9418
		2636.54	2836.73	2563.59	2665.06	2719.25	2684.23			40.5079
	BP	32785.4	36320.6	37320.2	37685.4	33150.7	35452.4	788.25	1219.25	43.4294	42.9011	85.8023	4.10594
		36589.7	36205.9	35590.1	35955.4	36954.9	36259.2			44.4528
		34859.6	36859.1	35475.4	35840.6	35224.9	35651.9			43.6824
		36414.2	35857.9	31801.8	33622.1	35300.9	34599.4			42.3471
		34370.2	33813.8	34735.4	33632.8	33256.9	33961.8			41.5383
		36779.4	32358.2	34746.1	34307	33267.6	34291.7			41.9567
	BPA	1258.47	1286.99	1201.14	1225.36	1423.58	1279.11	33.11	-90.19	41.356	41.2365	82.4729	5.00406
		1302.36	1330.88	1491.41	1325.63	1263.52	1342.76			43.2785
		1355.23	1383.75	1245.36	1205.67	1189.87	1275.98			41.2614
		1254.87	1214.58	1325.14	1147.58	1277.79	1243.99			40.2954
		1195.33	1296.54	1285.41	1236.54	1366.14	1275.99			41.2619
		1219.33	1157.25	1251.36	1325.14	1212.25	1233.07			39.9654
	DEP	121363	117786	119510	116691	114245	117919	2201.35	9873.7	49.0814	48.0124	96.0247	2.72598
		118414	117668	117421	119145	118779	118285			49.2478
		116325	118443	117302	117056	116937	117213			48.7605
		110478	118215	111000	115914	109113	112944			46.8214
		112365	113525	117091	111225	111590	113159			46.9192
		118457	109823	112124	116280	112686	113874			47.2438

## Sheet: Linearity Intra day 1
	Intra day 1										Intra day 1										Intra day 1								Intra day 1
	Analyte	Peak Area									Analyte	Peak Area									Analyte	Peak Area							Analyte	Peak Area
		Test 1	Test 2	Test 3	Test 4	Test 5	Test 6					Test 1	Test 2	Test 3	Test 4	Test 5	Test 6					Test 1	Test 2	Test 3	Test 4	Test 5	Test 6			Test 1	Test 2	Test 3	Test 4	Test 5	Test 6
		P1	P2	P3	P4	P5	P6					P1	P2	P3	P4	P5	P6					P1	P2	P3	P4	P5	P6			P1	P2	P3	P4	P5	P6
	4NP	78.41	618.41	1352.41	1623.47	2014.52	3285.63				BP	1954.59	9737.71	16589.7	19556.3	22365.2	34258.3				BPA	74.52	224.36	541.25	734.52	805.63	1428.63		DEP	20300.5	32057.6	48589.3	58541.2	73441.6	112146
		75.54	621.25	1296.57	1547.52	1986.63	3364.25					1914.58	10045.8	15998.6	20558.4	21447.3	34856.2					72.63	228.33	539.78	739.25	802.41	1451.66			20957	33224.7	47985.3	58697.4	72996.5	112964
		80.25	614.23	1318.63	1596.07	2009.74	3341.87					1845.69	9173.33	16059	19985.6	20879.5	35258.7					73.25	226.66	537.54	738.41	803.69	1445.24			20812.3	32722.9	48683.5	59052.7	73214.7	113026
	Legend										Legend										Legend								Legend
	For 4NP and BP, P1 = 10 ng L-1										For 4NP and BP, P1 = 10 ng L-1										For 4NP and BP, P1 = 10 ng L-1								For 4NP and BP, P1 = 10 ng L-1
	For BPA and DEP, P1 = 50 ng L-1										For BPA and DEP, P1 = 50 ng L-1										For BPA and DEP, P1 = 50 ng L-1								For BPA and DEP, P1 = 50 ng L-1
	P2	100 ng L-1									P2	100 ng L-1									P2	100 ng L-1							P2	100 ng L-1
	P3	200 ng L-1									P3	200 ng L-1									P3	200 ng L-1							P3	200 ng L-1
	P4	250 ng L-1									P4	250 ng L-1									P4	250 ng L-1							P4	250 ng L-1
	P5	300 ng L-1									P5	300 ng L-1									P5	300 ng L-1							P5	300 ng L-1
	P6	500 ng L-1									P6	500 ng L-1									P6	500 ng L-1							P6	500 ng L-1
	Results of 4NP										Results of BP										Results of BPA								Results of DEP
	Regression Statistic										Regression Statistic										Regression Statistic								Regression Statistic
	Multiple R	0.999409									Multiple R	0.996331									Multiple R	0.998886							Multiple R	0.997821
	R Square	0.998819									R Square	0.992674									R Square	0.997773							R Square	0.995647
	Adjusted R Square	0.998754									Adjusted R Square	0.992267									Adjusted R Square	0.997624							Adjusted R Square	0.995357
	Standard Error	37.3642									Standard Error	918.584									Standard Error	21.9428							Standard Error	2056.21
	ANOVA										ANOVA										ANOVA								ANOVA
		df	SS	MS	F	Significance F						df	SS	MS	F	Significance F						df	SS	MS	F	Significance F				df	SS	MS	F	Significance F
	Regression	1	2.12553e+07	2.12553e+07	15224.9	8.28618e-28					Regression	1	2.05816e+09	2.05816e+09	2439.16	1.13048e-20					Regression	1	3.23535e+06	3.23535e+06	6719.51	2.60302e-21			Regression	1	1.4506e+10	1.4506e+10	3430.93	3.96628e-19
	Residual	15	25129.6	1396.09							Residual	15	1.51883e+07	843797							Residual	15	7222.29	481.486					Residual	15	6.34199e+07	4.22799e+06
	Total	16	2.12804e+07								Total	16	2.07334e+09								Total	16	3.24257e+06						Total	16	1.45694e+10
		Coefficients	Standard Error	t Stat	P-Value	Lower 95%	Upper 95%					Coefficients	Standard Error	t Stat	P-Value	Lower 95%	Upper 95%					Coefficients	Standard Error	t Stat	P-Value	Lower 95%	Upper 95%			Coefficients	Standard Error	t Stat	P-Value	Lower 95%	Upper 95%
	Intercept	-27.5325	14.1675	-1.94336	0.0677786	-57.2973	2.23233				Intercept	2413.01	348.302	6.92793	1.78397e-06	1681.26	3144.77				Intercept	-66.0587	10.5091	-6.28584	1.45978e-05	-88.4584	-43.659		Intercept	10208	984.787	10.3657	3.10865e-08	8109.01	12307.1
	10	66.9094	0.542263	123.389	8.28618e-28	65.7701	68.0486				10	658.405	13.3313	49.3878	1.13048e-20	630.397	686.413				50	30.4293	0.371213	81.9726	2.60302e-21	29.6381	31.2205		50	2037.53	34.7855	58.5741	3.96628e-19	1963.39	2111.68

## Sheet: Linearity Intra day 2
	Intra day 2								Intra day 2								Intra day 2								Intra day 2
	Analyte	Peak Area							Analyte	Peak Area							Analyte	Peak Area							Analyte	Peak Area
		Test 1	Test 2	Test 3	Test 4	Test 5	Test 6			Test 1	Test 2	Test 3	Test 4	Test 5	Test 6			Test 1	Test 2	Test 3	Test 4	Test 5	Test 6			Test 1	Test 2	Test 3	Test 4	Test 5	Test 6
		P1	P2	P3	P4	P5	P6			P1	P2	P3	P4	P5	P6			P1	P2	P3	P4	P5	P6			P1	P2	P3	P4	P5	P6
	4NP	78.52	604.14	1296.11	1556.74	1901.41	3159.87		BP	1985.63	9657.23	16672.6	18969.6	22812.5	34121.3		BPA	87.45	244.325	521.47	748.52	856.96	1464.19		DEP	21015.8	33052.5	48636.3	58967.5	73536.1	114524
		76.23	596.52	1321.36	1609.61	1997.41	3014.25			2045.59	9800.72	16798.6	20147.3	20803.9	34716.8			88.63	241.25	525.63	746.25	854.25	1478.09			20406.7	31998.4	47969.5	61058	71052.9	112524
		73.23	603.54	1271.09	1624.63	1873.14	3109.71			1725.36	8875.29	16540.8	19585.9	20879.5	35117.7			87.52	238.47	522.29	747.58	852.25	1423.08			19310.9	32636.7	49625.2	58661.4	69854.4	115749
	Legend								Legend								Legend								Legend
	For 4NP and BP, P1 = 10 ng L-1								For 4NP and BP, P1 = 10 ng L-1								For 4NP and BP, P1 = 10 ng L-1								For 4NP and BP, P1 = 10 ng L-1
	For BPA and DEP, P1 = 50 ng L-1								For BPA and DEP, P1 = 50 ng L-1								For BPA and DEP, P1 = 50 ng L-1								For BPA and DEP, P1 = 50 ng L-1
	P2	100 ng L-1							P2	100 ng L-1							P2	100 ng L-1							P2	100 ng L-1
	P3	200 ng L-1							P3	200 ng L-1							P3	200 ng L-1							P3	200 ng L-1
	P4	250 ng L-1							P4	250 ng L-1							P4	250 ng L-1							P4	250 ng L-1
	P5	300 ng L-1							P5	300 ng L-1							P5	300 ng L-1							P5	300 ng L-1
	P6	500 ng L-1							P6	500 ng L-1							P6	500 ng L-1							P6	500 ng L-1
	Results of 4NP								Results of BP								Results of BPA								Results of DEP
	Regression Statistic								Regression Statistic								Regression Statistic								Regression Statistic
	Multiple R	0.998961							Multiple R	0.996157							Multiple R	0.998423							Multiple R	0.997938
	R Square	0.997922							R Square	0.99233							R Square	0.996848							R Square	0.995881
	Adjusted R Square	0.997813							Adjusted R Square	0.991926							Adjusted R Square	0.996638							Adjusted R Square	0.995606
	Standard Error	46.7079							Standard Error	945.941							Standard Error	26.1755							Standard Error	2037.03
	ANOVA								ANOVA								ANOVA								ANOVA
		df	SS	MS	F	Significance F				df	SS	MS	F	Significance F				df	SS	MS	F	Significance F				df	SS	MS	F	Significance F
	Regression	1	1.99094e+07	1.99094e+07	9125.95	5.94559e-27			Regression	1	2.19949e+09	2.19949e+09	2458.07	1.45918e-21			Regression	1	3.25026e+06	3.25026e+06	4743.8	3.52143e-20			Regression	1	1.50476e+10	1.50476e+10	3626.35	2.6222e-19
	Residual	15	41450.8	2181.62					Residual	15	1.70013e+07	894804					Residual	15	10277.4	685.159					Residual	15	6.22425e+07	4.1495e+06
	Total	16	1.99508e+07						Total	16	2.21649e+09						Total	16	3.26053e+06						Total	16	1.51098e+10
		Coefficients	Standard Error	t Stat	P-Value	Lower 95%	Upper 95%			Coefficients	Standard Error	t Stat	P-Value	Lower 95%	Upper 95%			Coefficients	Standard Error	t Stat	P-Value	Lower 95%	Upper 95%			Coefficients	Standard Error	t Stat	P-Value	Lower 95%	Upper 95%
	Intercept	17.986	16.6237	1.08195	0.292816	-16.8078	52.7797		Intercept	2453.46	336.667	7.28749	6.50843e-07	1748.81	3158.11		Intercept	-59.7917	12.5363	-4.76947	0.000248331	-86.5123	-33.0711		Intercept	9314.53	975.603	9.54746	9.15771e-08	7235.08	11394
	10	62.2819	0.651962	95.5299	5.94559e-27	60.9173	63.6464		10	654.627	13.2037	49.5789	1.45918e-21	626.991	682.262		50	30.4993	0.44282	68.8753	3.52143e-20	29.5555	31.4432		50	2075.22	34.4611	60.2192	2.6222e-19	2001.77	2148.67

## Sheet: Linearity Inter day
	Inter day								Inter day								Inter day								Inter day
	Analyte	Peak Area							Analyte	Peak Area							Analyte	Peak Area							Analyte	Peak Area
		Test 1	Test 2	Test 3	Test 4	Test 5	Test 6			Test 1	Test 2	Test 3	Test 4	Test 5	Test 6			Test 1	Test 2	Test 3	Test 4	Test 5	Test 6			Test 1	Test 2	Test 3	Test 4	Test 5	Test 6
		P1	P2	P3	P4	P5	P6			P1	P2	P3	P4	P5	P6			P1	P2	P3	P4	P5	P6			P1	P2	P3	P4	P5	P6
	4NP	78.52	604.14	1296.1	1556.74	1901.41	3159.87		BP	1985.63	9657.23	16672.6	18969.6	22812.5	34121.3		BPA	87.45	244.325	521.47	748.52	856.96	1464.19		DEP	21015.8	33052.5	48636.3	58967.5	73536.1	114524
		76.23	596.52	1321.36	1609.61	1997.4	3014.25			2045.59	9800.72	16798.6	20147.3	20803.9	34716.8			88.63	241.25	525.63	746.25	854.25	1478.09			20406.7	31998.4	47969.5	61058	71052.9	112524
		73.23	603.54	1271.09	1624.63	1873.14	3109.7			1725.36	8875.29	16540.8	19585.9	20879.5	35117.7			87.52	238.47	522.29	747.58	852.25	1423.08			19310.9	32636.7	49625.2	58661.4	69854.4	115749
		78.41	618.41	1352.41	1623.47	2014.52	3285.63			1954.59	9737.71	16589.7	19556.3	22365.2	34258.3			74.52	224.36	541.25	734.52	805.63	1428.63			20300.5	32057.6	48589.3	58541.2	73441.6	112146
		75.54	621.25	1296.57	1547.52	1986.63	3364.25			1914.58	10045.8	15998.6	20558.4	21447.3	34856.2			72.63	228.33	539.78	739.25	802.41	1451.66			20957	33224.7	47985.3	58697.4	72996.5	112964
		80.25	614.23	1318.63	1596.07	2009.74	3341.87			1845.69	9173.33	16059	19985.6	20879.5	35258.7			73.25	226.66	537.54	738.41	803.69	1445.24			20812.3	32722.9	48683.5	59052.7	73214.7	113026
	Legend								Legend								Legend								Legend
	For 4NP and BP, P1 = 10 ng L-1								For 4NP and BP, P1 = 10 ng L-1								For 4NP and BP, P1 = 10 ng L-1								For 4NP and BP, P1 = 10 ng L-1
	For BPA and DEP, P1 = 50 ng L-1								For BPA and DEP, P1 = 50 ng L-1								For BPA and DEP, P1 = 50 ng L-1								For BPA and DEP, P1 = 50 ng L-1
	P2	100 ng L-1							P2	100 ng L-1							P2	100 ng L-1							P2	100 ng L-1
	P3	200 ng L-1							P3	200 ng L-1							P3	200 ng L-1							P3	200 ng L-1
	P4	250 ng L-1							P4	250 ng L-1							P4	250 ng L-1							P4	250 ng L-1
	P5	300 ng L-1							P5	300 ng L-1							P5	300 ng L-1							P5	300 ng L-1
	P6	500 ng L-1							P6	500 ng L-1							P6	500 ng L-1							P6	500 ng L-1
	Results of 4NP								Results of BP								Results of BPA								Results of DEP
	Regression Statistic								Regression Statistic								Regression Statistic								Regression Statistic
	Multiple R	0.998246							Multiple R	0.996146							Multiple R	0.998681							Multiple R	0.997927
	R Square	0.996495							R Square	0.992307							R Square	0.997363							R Square	0.995858
	Adjusted R Square	0.996405							Adjusted R Square	0.992165							Adjusted R Square	0.997283							Adjusted R Square	0.995733
	Standard Error	60.9695							Standard Error	888.625							Standard Error	23.389							Standard Error	1977.32
	ANOVA								ANOVA								ANOVA								ANOVA
		df	SS	MS	F	Significance F				df	SS	MS	F	Significance F				df	SS	MS	F	Significance F				df	SS	MS	F	Significance F
	Regression	1	4.12142e+07	4.12142e+07	11087.2	1.68412e-49			Regression	1	5.50042e+09	5.50042e+09	6965.61	9.1104e-59			Regression	1	6.82756e+06	6.82756e+06	12480.8	3.87703e-44			Regression	1	3.10236e+10	3.10236e+10	7934.83	6.66215e-41
	Residual	33	144974	3717.29					Residual	33	4.26413e+07	789654					Residual	33	18052.5	547.045					Residual	33	1.29023e+08	3.9098e+06
	Total	34	4.13591e+07						Total	34	5.54306e+09						Total	34	6.84561e+06						Total	34	3.11526e+10
		Coefficients	Standard Error	t Stat	P-Value	Lower 95%	Upper 95%			Coefficients	Standard Error	t Stat	P-Value	Lower 95%	Upper 95%			Coefficients	Standard Error	t Stat	P-Value	Lower 95%	Upper 95%			Coefficients	Standard Error	t Stat	P-Value	Lower 95%	Upper 95%
	Intercept	-3.43907	15.8216	-0.217366	0.829056	-35.4412	28.5631		Intercept	2634.58	210.752	12.5008	1.4294e-17	2212.05	3057.11		Intercept	-63.0999	7.61359	-8.28779	1.42684e-09	-78.5898	-47.6099		Intercept	9848.56	643.658	15.3009	1.51762e-16	8539.03	11158.1
	10	64.5551	0.613084	105.296	1.68412e-49	63.315	65.7952		10	651.014	7.80029	83.4602	9.1104e-59	635.376	666.653		50	30.4693	0.272735	111.717	3.87703e-44	29.9144	31.0242		50	2053.88	23.0572	89.0776	6.66215e-41	2006.97	2100.79

## Sheet: Matrix Effect - Ultrapure water
	Matrix effect								Matrix effect								Matrix effect								Matrix effect
	Analyte	Peak Area							Analyte	Peak Area							Analyte	Peak Area							Analyte	Peak Area
		Test 1	Test 2	Test 3	Test 4	Test 5	Test 6			Test 1	Test 2	Test 3	Test 4	Test 5	Test 6			Test 1	Test 2	Test 3	Test 4	Test 5	Test 6			Test 1	Test 2	Test 3	Test 4	Test 5	Test 6
		P1	P2	P3	P4	P5	P6			P1	P2	P3	P4	P5	P6			P1	P2	P3	P4	P5	P6			P1	P2	P3	P4	P5	P6
	4NP	25.677	224.865	415.25	500.898	615.451	945.63		BP	2559.73	5585.72	10171.4	10054.3	14139	19595.8		BPA	95.875	194.829	345.58	387.41	433.899	701.739		DEP	7654.54	11444	19101.8	22678.9	25922.4	37008.6
		23.4556	203.63	398.41	559.792	640.858	956.36			2806.12	5952.59	11905.2	10714.7	14496.4	21185.4			129.332	174.685	323.167	415.24	465.069	768.737			7596.65	11017	18966.6	22425.1	25910.5	37702.6
		24.013	198.098	408.41	522.594	597.41	945.22			2531.01	5251.3	10502.6	9452.33	14255.6	21553.2			84.585	187.45	346.782	399.292	447.207	742.13			7545.25	12279	18411.4	22192.6	26490.3	37675.2
		20.9456	195.535	417.241	490.855	586.283	951.26			2558.6	5188.66	10577.3	9339.59	15242	19997.5			71.316	195.922	362.456	403.848	452.31	710.29			7605.69	12055.2	18552.9	22407.2	25987.5	37297.4
		23.0556	207.89	410.36	482.854	553.197	963.57			2835.74	5396.46	10892.9	9713.62	15171.6	20433.3			103.48	164.863	350.415	398.14	445.917	696.453			7496.65	11728.4	18580.9	22821.7	25588.9	36778.9
	Medium	23.4294	206.004	409.934	511.399	598.64	952.408		Medium	2658.24	5474.94	10809.9	9854.9	14660.9	20553		Medium	96.9176	183.55	345.68	400.786	448.88	723.87		Medium	7579.76	11704.7	18722.7	22505.1	25979.9	37292.5
	Calibration Factor (Fc)	0.426815	0.485428	0.487883	0.488855	0.501136	0.524985		Calibration Factor (Fc)	0.00376189	0.018265	0.0185016	0.0253681	0.0204626	0.0243273		Calibration Factor (Fc)	0.515902	0.544811	0.57857	0.623774	0.66833	0.690732		Calibration Factor (Fc)	0.00659652	0.00854357	0.0106822	0.0111086	0.0115474	0.0134075
	Standard Deviation (SD) Fc	0.032446							Standard Deviation (SD) Fc	0.00777471							Standard Deviation (SD) Fc	0.0692277							Standard Deviation (SD) Fc	0.0024005
	Legend								Legend								Legend								Legend
	For 4NP and BP, P1 = 10 ng L-1								For 4NP and BP, P1 = 10 ng L-1								For 4NP and BP, P1 = 10 ng L-1								For 4NP and BP, P1 = 10 ng L-1
	For BPA and DEP, P1 = 50 ng L-1								For BPA and DEP, P1 = 50 ng L-1								For BPA and DEP, P1 = 50 ng L-1								For BPA and DEP, P1 = 50 ng L-1
	P2	100 ng L-1							P2	100 ng L-1							P2	100 ng L-1							P2	100 ng L-1
	P3	200 ng L-1							P3	200 ng L-1							P3	200 ng L-1							P3	200 ng L-1
	P4	250 ng L-1							P4	250 ng L-1							P4	250 ng L-1							P4	250 ng L-1
	P5	300 ng L-1							P5	300 ng L-1							P5	300 ng L-1							P5	300 ng L-1
	P6	500 ng L-1							P6	500 ng L-1							P6	500 ng L-1							P6	500 ng L-1
	Results of 4NP								Results of BP								Results of BPA								Results of DEP
	Regression Statistic								Regression Statistic								Regression Statistic								Regression Statistic
	Multiple R	0.995147							Multiple R	0.995258							Multiple R	0.995892							Multiple R	0.996265
	R Square	0.990317							R Square	0.990538							R Square	0.991801							R Square	0.992544
	Adjusted R Square	0.990069							Adjusted R Square	0.990332							Adjusted R Square	0.991623							Adjusted R Square	0.992347
	Standard Error	27.4937							Standard Error	572.203							Standard Error	18.6574							Standard Error	833.887
	ANOVA								ANOVA								ANOVA								ANOVA
		df	SS	MS	F	Significance F				df	SS	MS	F	Significance F				df	SS	MS	F	Significance F				df	SS	MS	F	Significance F
	Regression	1	3.01514e+06	3.01514e+06	3988.79	6.80133e-41			Regression	1	1.57672e+09	1.57672e+09	4815.65	3.29296e-48			Regression	1	1.93702e+06	1.93702e+06	5564.58	1.21947e-49			Regression	1	3.51733e+09	3.51733e+09	5058.23	4.88537e-42
	Residual	23	29480.3	755.905					Residual	23	1.50611e+07	327416					Residual	23	16012.5	348.099					Residual	23	2.6424e+07	695368
	Total	24	3.04462e+06						Total	24	1.59178e+09						Total	24	1.95304e+06						Total	24	3.54375e+09
		Coefficients	Standard Error	t Stat	P-Value	Lower 95%	Upper 95%			Coefficients	Standard Error	t Stat	P-Value	Lower 95%	Upper 95%			Coefficients	Standard Error	t Stat	P-Value	Lower 95%	Upper 95%			Coefficients	Standard Error	t Stat	P-Value	Lower 95%	Upper 95%
	Intercept	21.5694	8.24126	2.61724	0.0125504	4.89987	38.2389		Intercept	2248.66	136.855	16.431	7.11458e-21	1973.19	2524.14		Intercept	40.4826	4.78055	8.46819	6.09386e-11	30.8599	50.1054		Intercept	5357.51	258.429	20.7311	2.58095e-22	4834.35	5880.67
	10	18.6819	0.295802	63.1569	6.80133e-41	18.0836	19.2802		10	368.649	5.31233	69.3949	3.29296e-48	357.955	379.342		50	13.7645	0.18452	74.5961	1.21947e-49	13.3931	14.1359		50	651.864	9.16553	71.1212	4.88537e-42	633.309	670.418

## Sheet: Matrix Effect - Surface water
	Matrix effect								Matrix effect								Matrix effect								Matrix effect								Analyte
	Analyte	Peak Area							Analyte	Peak Area							Analyte	Peak Area							Analyte	Peak Area								matrix		ultrapure water		Calculated F	Critical F
		Test 1	Test 2	Test 3	Test 4	Test 5	Test 6			Test 1	Test 2	Test 3	Test 4	Test 5	Test 6			Test 1	Test 2	Test 3	Test 4	Test 5	Test 6			Test 1	Test 2	Test 3	Test 4	Test 5	Test 6			SD	SD2	SD	SD2
		P1	P2	P3	P4	P5	P6			P1	P2	P3	P4	P5	P6			P1	P2	P3	P4	P5	P6			P1	P2	P3	P4	P5	P6		4NP	0.0130066	0.000169173	0.03244	0.00105235	6.22058	1.98
	4NP	80.52	632.54	1507.84	1625.34	1950.41	3415.74		BP	1014.52	9147.52	18295	21486.8	25784.1	40256.3		BPA	95.875	194.829	345.58	387.41	433.899	701.739		DEP	19635.4	35963.6	54525.4	62587.4	72552.4	121637		BP	0.00109383	1.19647e-06	0.00777	6.03729e-05	50.4592
		82.63	621.24	1425.41	1614.25	1937.1	3256.47			1145.63	9363.52	18727	22365.4	26838.5	41254.9			129.332	174.685	323.167	415.24	465.069	768.737			19254.8	34525.5	52363.1	62236.6	74234.5	120595		BPA	0.0692277	0.00479248	0.06922	0.00479141	1.00022
		80.24	617.54	1387.69	1736.64	2083.97	3358.97			1048.59	9254.47	18508.9	21587.4	25904.9	41259.6			84.585	187.45	346.782	399.292	447.207	742.13			20014.4	36323.5	55007.5	63725.1	73663.1	121252		DEP	0.00068884	4.745e-07	0.0024	5.76e-06	12.1391
		78.23	641.25	1452.8	1552.8	1863.36	3271.68			1089.51	9490.92	18981.8	20856.7	25028.1	40032.7			71.316	195.922	362.456	403.848	452.31	710.29			20256.7	35702.4	53696.5	64254.7	71965.1	120487
		79.41	607.337	1350.95	1550.95	1861.14	3339.01			1106.06	9458.78	18917.6	21986	26383.2	37647.5			103.48	164.863	350.415	398.14	445.917	696.453			19963.5	34830.1	54236.9	62029	74856.1	126479
	Medium	80.206	623.981	1424.94	1616	1939.2	3328.37		Medium	1080.86	9343.04	18686.1	21656.5	25987.7	40090.2		Medium	96.9176	183.55	345.68	400.786	448.88	723.87		Medium	19825	35469	53965.9	62966.6	73454.3	122090
	Calibration Factor (Fc)	0.124679	0.160261	0.140357	0.154703	0.154703	0.150224		Calibration Factor (Fc)	0.00925187	0.0107032	0.0107032	0.0115439	0.0115439	0.0124719		Calibration Factor (Fc)	0.515902	0.544811	0.57857	0.623774	0.66833	0.690732		Calibration Factor (Fc)	0.00252207	0.00281936	0.00370605	0.00397036	0.00408417	0.00409534
	Standard Deviation (SD) Fc	0.0130066							Standard Deviation (SD) Fc	0.00109383							Standard Deviation (SD) Fc	0.0692277							Standard Deviation (SD) Fc	0.00068884
	Legend								Legend								Legend								Legend
	For 4NP and BP, P1 = 10 ng L-1								For 4NP and BP, P1 = 10 ng L-1								For 4NP and BP, P1 = 10 ng L-1								For 4NP and BP, P1 = 10 ng L-1
	For BPA and DEP, P1 = 50 ng L-1								For BPA and DEP, P1 = 50 ng L-1								For BPA and DEP, P1 = 50 ng L-1								For BPA and DEP, P1 = 50 ng L-1
	P2	100 ng L-1							P2	100 ng L-1							P2	100 ng L-1							P2	100 ng L-1
	P3	200 ng L-1							P3	200 ng L-1							P3	200 ng L-1							P3	200 ng L-1
	P4	250 ng L-1							P4	250 ng L-1							P4	250 ng L-1							P4	250 ng L-1
	P5	300 ng L-1							P5	300 ng L-1							P5	300 ng L-1							P5	300 ng L-1
	P6	500 ng L-1							P6	500 ng L-1							P6	500 ng L-1							P6	500 ng L-1
	Results of 4NP								Results of BP								Results of BPA								Results of DEP
	Regression Statistic								Regression Statistic								Regression Statistic								Regression Statistic
	Multiple R	0.99783							Multiple R	0.996157							Multiple R	0.995918							Multiple R	0.996738
	R Square	0.995664							R Square	0.992329							R Square	0.991852							R Square	0.993486
	Adjusted R Square	0.995537							Adjusted R Square	0.992104							Adjusted R Square	0.991598							Adjusted R Square	0.993245
	Standard Error	67.7316							Standard Error	1094.02							Standard Error	42.7121							Standard Error	2585.54
	ANOVA								ANOVA								ANOVA								ANOVA
		df	SS	MS	F	Significance F				df	SS	MS	F	Significance F				df	SS	MS	F	Significance F				df	SS	MS	F	Significance F
	Regression	1	3.58202e+07	3.58202e+07	7808.09	9.19806e-42			Regression	1	5.26452e+09	5.26452e+09	4398.55	1.50184e-37			Regression	1	7.10652e+06	7.10652e+06	3895.42	5.30053e-35			Regression	1	2.753e+10	2.753e+10	4118.16	4.67909e-31
	Residual	23	155977	4587.57					Residual	23	4.06938e+07	1.19688e+06					Residual	23	58378.4	1824.32					Residual	23	1.80495e+08	6.68501e+06
	Total	24	3.59762e+07						Total	24	5.30521e+09						Total	24	7.1649e+06						Total	24	2.77105e+10
		Coefficients	Standard Error	t Stat	P-Value	Lower 95%	Upper 95%			Coefficients	Standard Error	t Stat	P-Value	Lower 95%	Upper 95%			Coefficients	Standard Error	t Stat	P-Value	Lower 95%	Upper 95%			Coefficients	Standard Error	t Stat	P-Value	Lower 95%	Upper 95%
	Intercept	4.63234	17.671	0.262144	0.794792	-31.2794	40.5441		Intercept	1433.27	285.426	5.02152	1.61094e-05	853.217	2013.33		Intercept	-98.9392	12.8907	-7.67525	9.50908e-09	-125.197	-72.6818		Intercept	9873.76	906.465	10.8926	2.19879e-11	8013.84	11733.7
	10	65.8258	0.744945	88.3634	9.19806e-42	64.3119	67.3398		10	798.016	12.0325	66.3215	1.50184e-37	773.563	822.469		50	32.7405	0.524575	62.4133	5.30053e-35	31.6719	33.809		50	2201.35	34.3034	64.1729	4.67909e-31	2130.97	2271.73

## Sheet: Robustness - Control
	Robustness - Control								Robustness - Control								Robustness - Control								Robustness - Control
	Analyte	Peak Area							Analyte	Peak Area							Analyte	Peak Area							Analyte	Peak Area
		Test 1	Test 2	Test 3	Test 4	Test 5	Test 6			Test 1	Test 2	Test 3	Test 4	Test 5	Test 6			Test 1	Test 2	Test 3	Test 4	Test 5	Test 6			Test 1	Test 2	Test 3	Test 4	Test 5	Test 6
		P1	P2	P3	P4	P5	P6			P1	P2	P3	P4	P5	P6			P1	P2	P3	P4	P5	P6			P1	P2	P3	P4	P5	P6
	4NP	80.52	632.54	1507.84	1625.34	1950.41	3415.74		BP	1014.52	9147.52	18295	21486.8	25784.1	40256.3		BPA	95.875	194.829	345.58	387.41	433.899	701.739		DEP	19635.4	35963.6	54525.4	62587.4	72552.4	121637
		82.63	621.24	1425.41	1614.25	1937.1	3256.47			1145.63	9363.52	18727	22365.4	26838.5	41254.9			129.332	174.685	323.167	415.24	465.069	768.737			19254.8	34525.5	52363.1	62236.6	74234.5	120595
		80.24	617.54	1387.69	1736.64	2083.97	3358.97			1048.59	9254.47	18508.9	21587.4	25904.9	41259.6			84.585	187.45	346.782	399.292	447.207	742.13			20014.4	36323.5	55007.5	63725.1	73663.1	121252
		81.23	641.25	1452.8	1552.8	1863.36	3271.68			1089.51	9490.92	18981.8	20856.7	25028.1	40032.7			71.316	195.922	362.456	403.848	452.31	710.29			20256.7	35702.4	53696.5	64254.7	71965.1	120487
		82.41	607.337	1350.95	1550.95	1861.14	3339.01			1106.06	9458.78	18917.6	21986	26383.2	37647.5			103.48	164.863	350.415	398.14	445.917	696.453			19963.5	34830.1	54236.9	62029	74856.1	126479
	Medium	81.406	623.981	1424.94	1616	1939.2	3328.37		Medium	1080.86	9343.04	18686.1	21656.5	25987.7	40090.2		Medium	96.9176	183.55	345.68	400.786	448.88	723.87		Medium	19825	35469	53965.9	62966.6	73454.3	122090
	Calibration Factor (Fc)	0.122841	0.160261	0.140357	0.154703	0.154703	0.150224		Calibration Factor (Fc)	0.00925187	0.0107032	0.0107032	0.0115439	0.0115439	0.0124719		Calibration Factor (Fc)	0.515902	0.544811	0.57857	0.623774	0.66833	0.690732		Calibration Factor (Fc)	0.00252207	0.00281936	0.00370605	0.00397036	0.00408417	0.00409534
	Standard Deviation (SD) Fc	0.0136566							Standard Deviation (SD) Fc	0.00109383							Standard Deviation (SD) Fc	0.0692277							Standard Deviation (SD) Fc	0.00068884
	Legend								Legend								Legend								Legend
	For 4NP and BP, P1 = 10 ng L-1								For 4NP and BP, P1 = 10 ng L-1								For 4NP and BP, P1 = 10 ng L-1								For 4NP and BP, P1 = 10 ng L-1
	For BPA and DEP, P1 = 50 ng L-1								For BPA and DEP, P1 = 50 ng L-1								For BPA and DEP, P1 = 50 ng L-1								For BPA and DEP, P1 = 50 ng L-1
	P2	100 ng L-1							P2	100 ng L-1							P2	100 ng L-1							P2	100 ng L-1
	P3	200 ng L-1							P3	200 ng L-1							P3	200 ng L-1							P3	200 ng L-1
	P4	250 ng L-1							P4	250 ng L-1							P4	250 ng L-1							P4	250 ng L-1
	P5	300 ng L-1							P5	300 ng L-1							P5	300 ng L-1							P5	300 ng L-1
	P6	500 ng L-1							P6	500 ng L-1							P6	500 ng L-1							P6	500 ng L-1
	Results of 4NP								Results of BP								Results of BPA								Results of DEP
	Regression Statistic								Regression Statistic								Regression Statistic								Regression Statistic
	Multiple R	0.99783							Multiple R	0.996157							Multiple R	0.995918							Multiple R	0.996738
	R Square	0.995664							R Square	0.992329							R Square	0.991852							R Square	0.993486
	Adjusted R Square	0.995537							Adjusted R Square	0.992104							Adjusted R Square	0.991598							Adjusted R Square	0.993245
	Standard Error	67.7316							Standard Error	1094.02							Standard Error	42.7121							Standard Error	2585.54
	ANOVA								ANOVA								ANOVA								ANOVA
		df	SS	MS	F	Significance F				df	SS	MS	F	Significance F				df	SS	MS	F	Significance F				df	SS	MS	F	Significance F
	Regression	1	3.58202e+07	3.58202e+07	7808.09	9.19806e-42			Regression	1	5.26452e+09	5.26452e+09	4398.55	1.50184e-37			Regression	1	7.10652e+06	7.10652e+06	3895.42	5.30053e-35			Regression	1	2.753e+10	2.753e+10	4118.16	4.67909e-31
	Residual	23	155977	4587.57					Residual	23	4.06938e+07	1.19688e+06					Residual	23	58378.4	1824.32					Residual	23	1.80495e+08	6.68501e+06
	Total	24	3.59762e+07						Total	24	5.30521e+09						Total	24	7.1649e+06						Total	24	2.77105e+10
		Coefficients	Standard Error	t Stat	P-Value	Lower 95%	Upper 95%			Coefficients	Standard Error	t Stat	P-Value	Lower 95%	Upper 95%			Coefficients	Standard Error	t Stat	P-Value	Lower 95%	Upper 95%			Coefficients	Standard Error	t Stat	P-Value	Lower 95%	Upper 95%
	Intercept	4.63234	17.671	0.262144	0.794792	-31.2794	40.5441		Intercept	1433.27	285.426	5.02152	1.61094e-05	853.217	2013.33		Intercept	-98.9392	12.8907	-7.67525	9.50908e-09	-125.197	-72.6818		Intercept	9873.76	906.465	10.8926	2.19879e-11	8013.84	11733.7
	10	65.8258	0.744945	88.3634	9.19806e-42	64.3119	67.3398		10	798.016	12.0325	66.3215	1.50184e-37	773.563	822.469		50	32.7405	0.524575	62.4133	5.30053e-35	31.6719	33.809		50	2201.35	34.3034	64.1729	4.67909e-31	2130.97	2271.73

## Sheet: Robustness - Flow
	Robustness - Flow										Robustness - Flow									Robustness - Flow										Robustness - Flow								Comparative curves
	Analyte	Peak Area									Analyte	Peak Area								Analyte	Peak Area									Analyte	Peak Area							analyte	Control		Flow		Calculated F	Critical F
		Test 1	Test 2	Test 3	Test 4	Test 5	Test 6					Test 1	Test 2	Test 3	Test 4	Test 5	Test 6				Test 1	Test 2	Test 3	Test 4	Test 5	Test 6					Test 1	Test 2	Test 3	Test 4	Test 5	Test 6			SD	SD2	SD	SD2
		P1	P2	P3	P4	P5	P6					P1	P2	P3	P4	P5	P6				P1	P2	P3	P4	P5	P6					P1	P2	P3	P4	P5	P6		4NP	0.01365	0.000186323	0.0147783	0.000218399	1.17215	2.48
	4NP	74.4085	584.53	1393.39	1501.98	1802.37	3156.49				BP	979.418	8831.02	17662	20743.3	24892	38863.5			BPA	96.3064	195.706	347.135	389.153	435.852	704.897				DEP	18388.6	33679.9	51063	58613.1	67945.3	121637		BP	0.00109	1.1881e-06	0.00113304	1.28377e-06	1.08052
		76.3584	574.088	1317.22	1491.73	1790.07	3009.3					1105.99	9039.54	18079.1	21591.6	25909.9	39827.5				129.914	175.471	324.622	417.109	467.162	772.196					18032.1	32333.1	49038.1	58284.5	69520.6	120595		BPA	0.06922	0.00479141	0.0689176	0.00474964	1.00879
		74.1498	570.669	1282.36	1604.83	1925.79	3104.02					1012.31	8934.27	17868.5	20840.5	25008.6	39832				84.9656	188.294	348.343	401.089	449.219	745.47					18743.4	34016.9	51514.5	59678.6	68985.5	121252		DEP	0.000688	4.73344e-07	0.000697976	4.87171e-07	1.02921
		75.0646	592.579	1342.53	1434.94	1721.93	3023.36					1051.81	9162.53	18325.1	20135.1	24162.1	38647.5				71.6369	196.804	364.087	405.665	454.345	713.486					18970.4	33435.3	50286.7	60174.5	67395.4	120487
		76.1551	561.24	1248.42	1433.24	1719.88	3085.58					1067.79	9131.51	18263	21225.2	25470.3	36344.9				103.946	165.605	351.992	399.932	447.923	699.587					18695.8	32618.4	50792.8	58090.2	70102.8	126479
	Medium	75.2273	576.621	1316.79	1493.34	1792.01	3075.75				Medium	1043.46	9019.77	18039.5	20907.1	25088.6	38703.1			Medium	97.3537	184.376	347.236	402.59	450.9	727.127				Medium	18566.1	33216.7	50539	58968.2	68789.9	122090
	Calibration Factor (Fc)	0.13293	0.173424	0.151885	0.16741	0.16741	0.162562				Calibration Factor (Fc)	0.00958346	0.0110868	0.0110868	0.0119576	0.0119576	0.0129189			Calibration Factor (Fc)	0.513591	0.542371	0.575978	0.62098	0.665336	0.687638				Calibration Factor (Fc)	0.00269309	0.00301053	0.00395734	0.00423957	0.0043611	0.00409534
	Standard Deviation (SD) Fc	0.0147783									Standard Deviation (SD) Fc	0.00113304								Standard Deviation (SD) Fc	0.0689176									Standard Deviation (SD) Fc	0.000697976
	Legend										Legend									Legend										Legend
	For 4NP and BP, P1 = 10 ng L-1										For 4NP and BP, P1 = 10 ng L-1									For 4NP and BP, P1 = 10 ng L-1										For 4NP and BP, P1 = 10 ng L-1
	For BPA and DEP, P1 = 50 ng L-1										For BPA and DEP, P1 = 50 ng L-1									For BPA and DEP, P1 = 50 ng L-1										For BPA and DEP, P1 = 50 ng L-1
	P2	100 ng L-1									P2	100 ng L-1								P2	100 ng L-1									P2	100 ng L-1
	P3	200 ng L-1									P3	200 ng L-1								P3	200 ng L-1									P3	200 ng L-1
	P4	250 ng L-1									P4	250 ng L-1								P4	250 ng L-1									P4	250 ng L-1
	P5	300 ng L-1									P5	300 ng L-1								P5	300 ng L-1									P5	300 ng L-1
	P6	500 ng L-1									P6	500 ng L-1								P6	500 ng L-1									P6	500 ng L-1
