# Supplementary material for: Development and validation of an analytical method for detection and quantification of benzophenone, bisphenol A, diethyl phthalate and 4-nonylphenol by UPLC-MS/MS in surface water
Source: PeerJ journal article supplement (doi:10.7717/peerj-achem.7), 2020-07-06
Supplement: supplemental_material_3.xlsx [file supplemental_material_3.xlsx]

## Sheet: Monitoring - April 2018
	Nova Iguaçu City - April 2018
	Analyte	Peak Area					Peak Area - Blank	Analytical Curve parameters		Conc (µg L-1)	Real Conc (ng L-1)	Situation
		Test 1	Test 2	Test 3	medium	Blank		slope	intercept
	4NP	1.511	1.259	4.553	2.82689	no signal	2.82689	64.6	-3.43	0.0968559	0.968559	Detected
		2.355	3.451	1.742
		3.435	3.313	3.823
	BP	29588.6	27584.3	32521.3	31082.9	9821.02	21261.8	651	2630	28.6203	286.203	Quantified
		30058.7	28996.3	28996.4
		33337.5	35414.7	33247.9
	BPA	570.844	434.706	582.257	530.857	38.7265	492.131	30.5	-63.1	18.2043	182.043	Quantified
		597.576	466.912	578.027
		537.749	462.431	547.213
	DEP	312225	242696	264790	275773	20514.4	275773	2050	9840	129.723	1297.23	Quantified
		295666	265875	286366
		289745	245993	278598

## Sheet: Monitoring - May 2018
	Nova Iguaçu City - May 2018
	Analyte	Peak Area					Peak Area - Blank	Analytical Curve parameters		Conc (µg L-1)	Real Conc (ng L-1)	Situation
		Test 1	Test 2	Test 3	medium	Blank		slope	intercept
	4NP	2.103	1.724	1.178	1.66633	no signal	1.66633	64.6	-3.43	0.0788906	0.788906	Detected
		0.94	2.544	2.098
		1.688	1.088	1.634
	BP	14956.9	13986.5	14423.8	15208.4	9821.02	5387.37	651	2630	4.23559	42.3559	Quantified
		15532.2	17287.4	14359.6
		15792.9	15517.3	15018.9
	BPA	212.316	255.975	200.331	208.181	38.7265	169.454	30.5	-63.1	7.62474	76.2474	Quantified
		182.097	211.619	249.622
		193.237	202.296	166.136
	DEP	105844	100282	105991	103478	20514.4	103478	2050	9840	45.6772	456.772	Quantified
		102239	102036	111107
		100695	100362	102750

## Sheet: Monitoring - June 2018
	Nova Iguaçu City - June 2018
	Analyte	Peak Area					Peak Area - Blank	Analytical Curve parameters		Conc (µg L-1)	Real Conc (ng L-1)	Situation
		Test 1	Test 2	Test 3	medium	Blank		slope	intercept
	4NP	5.67	8.46	2.36	3.54811	no signal	3.54811	64.6	-3.43	0.10802	1.0802	Detected
		1.302	3.75	1.091
		3.857	4.2	1.243
	BP	14066.1	13432.9	12778.2	15162.9	9821.02	5341.89	651	2630	4.16573	41.6573	Quantified
		15039.3	15640.4	16641.3
		16325.3	15168.9	17373.9
	BPA	174.564	156.616	178.431	174.31	38.7265	135.584	30.5	-63.1	6.51422	65.1422	Quantified
		137.192	183.445	214.576
		137.576	189.708	196.683
	DEP	59087.6	63490.1	62615.1	63018	20514.4	63018	2050	9840	25.9405	259.405	Quantified
		59101.1	62922.7	66523.5
		61304.1	64650.5	67467.4

## Sheet: Monitoring - July 2018
	Nova Iguaçu City - July 2018
	Analyte	Peak Area					Peak Area - Blank	Analytical Curve parameters		Conc (µg L-1)	Real Conc (ng L-1)	Situation
		Test 1	Test 2	Test 3	medium	Blank		slope	intercept
	4NP	82.541	82.363	82.254	83.6307	no signal	83.6307	64.6	-3.43	1.34769	13.4769	Quantified
		81.962	87.365	81.365
		86.547	83.054	85.225
	BP	11850.6	10293.4	7059.42	10078	9821.02	257.004	651	2630	-3.64516	-36.4516	Detected
		11109.2	9936.62	8218.16
		12772.5	10954.3	8507.98
	BPA	149.859	151.16	196.382	150.462	38.7265	111.735	30.5	-63.1	5.7323	57.323	Quantified
		119.801	137.945	169.673
		102.979	147.376	178.979
	DEP	420996	399628	423364	430910	20514.4	430910	2050	9840	205.4	2054	Quantified
		409661	419610	455564
		433253	440590	475520

## Sheet: Monitoring - August 2018
	Nova Iguaçu City - August 2018
	Analyte	Peak Area					Peak Area - Blank	Analytical Curve parameters		Conc (µg L-1)	Real Conc (ng L-1)	Situation
		Test 1	Test 2	Test 3	medium	Blank		slope	intercept
	4NP	4.956	20.455	0.978	8.97956	no signal	8.97956	64.6	-3.43	0.192098	1.92098	Detected
		2.893	20.364	1.65
		4.694	21.994	2.832
	BP	12231.6	12598.6	11102.6	12751.8	9821.02	2930.79	651	2630	0.462042	4.62042	Detected
		12542	11343.1	15431.9
		12359.3	12599.9	14557.3
	BPA	241.193	216.36	226.61	225.014	38.7265	186.287	30.5	-63.1	8.17663	81.7663	Detected
		238.47	213.587	219.46
		229.283	225.554	214.607
	DEP	119816	111983	131123	121604	20514.4	121604	2050	9840	54.5193	545.193	Quantified
		120741	120727	124781
		125698	115021	124549
